# Supplementary material for: Prevention and Control of the Spread of Pathogens in a University of Naples Engineering Classroom through CFD Simulations
Source: MDPI journal article supplement (doi:10.3390/chemengineering8020037), 2024-04-01
Supplement: s1 [file s1]

# Prevention and Control of the Spread of Pathogens in a University of Naples Engineering Classroom through CFD Simulations

Maria Portarapillo \*, Salvatore Simioli, Almerinda Di Benedetto

Department of Chemical, Materials and Production Engineering, University of Naples Federico II Naples,  
80125 Naples, Italy

\*Corresponding author, e-mail: maria.portarapillo@unina.it

## *Grid independence test*

To demonstrate the reliability of the results, four meshes of different resolutions were built. In particular, CO<sub>2</sub> concentration expressed in ppm was evaluated along a cut line positioned 1.63 m above the ground and with an overall length of 1 m (**Figure S1**).

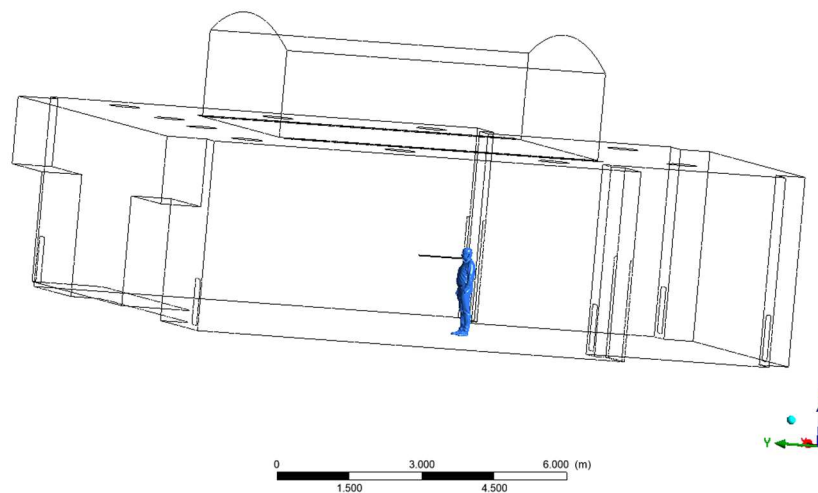

**Figure S1.** Graphical representation made with Ansys 2021R2 of the cut line positioned at the height of the breathing plane of the infected individual.

**Figure S2** shows a comparative representation of the four meshes in which the variation in CO<sub>2</sub> concentration (ppm) can be analyzed as a function of distance in meters. Taking into account a

maximum relative error of 4% compared to the denser mesh, the sparse mesh was used for all the following calculations.

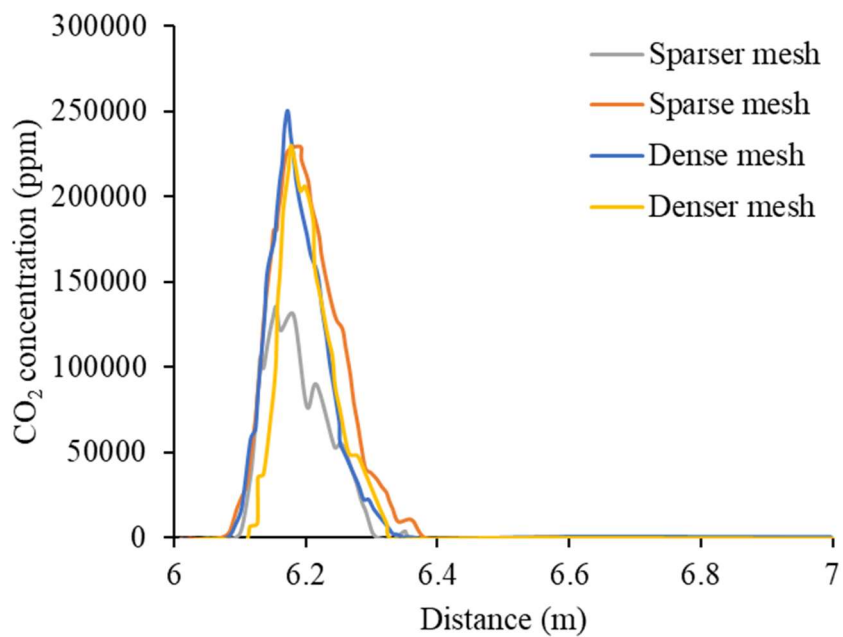

**Figure S2.** Graphical representation made with Ansys 2021R2 of the cut line positioned at the height of the breathing plane of the infected individual.

**Table S1.** Probability calculation performed for Case 1 at an interval of 30 minutes in the absence of PPE, in the presence of a surgical mask, and in the presence of an FFP2 mask.

| Position | E(ppm) | DR   | Probability without<br>DPI | Probability with surgical<br>mask | Probability with FFP2<br>mask |
|----------|--------|------|----------------------------|-----------------------------------|-------------------------------|
| a        | 600    | 100  | 13.9%                      | 10%                               | 3.7%                          |
| b        | 750    | 80   | 17.1%                      | 12.3%                             | 4.6%                          |
| c        | 950    | 63   | 21.1%                      | 15.3%                             | 5.8%                          |
| d        | 300    | 200  | 7.2%                       | 5.1%                              | 1.9%                          |
| e        | 50     | 1200 | 1.2%                       | 0.9%                              | 0.3%                          |
| f        | 300    | 200  | 7.2%                       | 5.1%                              | 1.9%                          |
| g        | 750    | 80   | 17.1%                      | 12.3%                             | 4.6%                          |
| h        | 300    | 200  | 7.2%                       | 5.1%                              | 1.9%                          |
| i        | 600    | 100  | 13.9%                      | 10.0%                             | 3.7%                          |

**Table S2.** Probability calculation performed for Case 1 at an interval of 1 hour in the absence of PPE, in the presence of a surgical mask, and in the presence of an FFP2 mask.

| Position | E(ppm) | DR   | Probability without<br>DPI | Probability with surgical<br>mask | Probability with FFP2<br>mask |
|----------|--------|------|----------------------------|-----------------------------------|-------------------------------|
| a        | 600    | 100  | 25.9%                      | 18.9%                             | 7.2%                          |
| b        | 750    | 80   | 31.3%                      | 23.1%                             | 8.9%                          |
| c        | 950    | 63   | 37.8%                      | 28.3%                             | 11.2%                         |
| d        | 300    | 200  | 13.9%                      | 10.0%                             | 3.7%                          |
| e        | 50     | 1200 | 2.5%                       | 1.7%                              | 0.6%                          |
| f        | 300    | 200  | 13.9%                      | 10.0%                             | 3.7%                          |
| g        | 600    | 100  | 25.9%                      | 18.9%                             | 7.2%                          |
| h        | 300    | 200  | 13.9%                      | 10.0%                             | 3.7%                          |
| i        | 600    | 100  | 25.9%                      | 18.9%                             | 7.2%                          |

**Table S3.** Probability calculation was performed for Case 1 at an interval of 2 hours in the absence of PPE, in the presence of a surgical mask, and in the presence of an FFP2 mask.

| Position | E(ppm) | DR  | Probability without<br>DPI | Probability with a surgical<br>mask | Probability with FFP2<br>mask |
|----------|--------|-----|----------------------------|-------------------------------------|-------------------------------|
| a        | 950    | 63  | 61.3%                      | 48.6%                               | 21.1%                         |
| b        | 950    | 63  | 61.3%                      | 48.6%                               | 21.1%                         |
| c        | 950    | 63  | 61.3%                      | 48.6%                               | 21.1%                         |
| d        | 700    | 86  | 50.3%                      | 38.7%                               | 16.1%                         |
| e        | 150    | 400 | 13.9%                      | 10.0%                               | 3.7%                          |
| f        | 600    | 100 | 45.1%                      | 34.3%                               | 13.9%                         |
| g        | 800    | 75  | 55.1%                      | 42.9%                               | 18.1%                         |
| h        | 300    | 200 | 25.9%                      | 18.9%                               | 7.2%                          |
| i        | 700    | 86  | 50.3%                      | 38.7%                               | 16.1%                         |

**Table S4.** Probability calculation performed for Case 2 at an interval of 30 minutes in the absence of PPE, in the presence of a surgical mask, and in the presence of an FFP2 mask.

| Position | E(ppm) | DR | Probability without<br>DPI | Probability with surgical<br>mask | Probability with FFP2<br>mask |
|----------|--------|----|----------------------------|-----------------------------------|-------------------------------|
| a        | 2000   | 30 | 39.3%                      | 29.5%                             | 11.8%                         |
| b        | 2000   | 30 | 39.3%                      | 29.5%                             | 11.8%                         |
| c        | 2000   | 30 | 39.3%                      | 29.5%                             | 11.8%                         |
| d        | 2000   | 30 | 39.3%                      | 29.5%                             | 11.8%                         |
| e        | 1800   | 33 | 36.2%                      | 27.0%                             | 10.6%                         |
| f        | 1900   | 32 | 37.8%                      | 28.3%                             | 11.2%                         |
| g        | 1900   | 32 | 37.8%                      | 28.3%                             | 11.2%                         |
| h        | 1800   | 33 | 36.2%                      | 27.0%                             | 10.6%                         |
| i        | 1800   | 33 | 36.2%                      | 27.0%                             | 10.6%                         |

**Table S5.** Probability calculation performed for Case 2 at an interval of 1 hour in the absence of PPE, in the presence of a surgical mask, and in the presence of an FFP2 mask.

| Position | E(ppm) | DR | Probability without<br>DPI | Probability with surgical<br>mask | Probability with FFP2<br>mask |
|----------|--------|----|----------------------------|-----------------------------------|-------------------------------|
| a        | 4000   | 15 | 86.5%                      | 75.3%                             | 39.3%                         |
| b        | 4000   | 15 | 86.5%                      | 75.3%                             | 39.3%                         |
| c        | 4000   | 15 | 86.5%                      | 75.3%                             | 39.3%                         |
| d        | 3000   | 20 | 77.7%                      | 65.0%                             | 31.3%                         |
| e        | 3000   | 20 | 77.7%                      | 65.0%                             | 31.3%                         |
| f        | 3800   | 16 | 85.0%                      | 73.6%                             | 37.8%                         |
| g        | 4000   | 15 | 86.5%                      | 75.3%                             | 39.3%                         |

|   |      |    |       |       |       |
|---|------|----|-------|-------|-------|
| h | 3000 | 20 | 77.7% | 65.0% | 31.3% |
| i | 3000 | 20 | 77.7% | 65.0% | 31.3% |

**Table S6.** Probability calculation performed for Case 2 at an interval of 2 hours in the absence of PPE, in the presence of a surgical mask, and in the presence of an FFP2 mask.

| Position | E(ppm) | DR | Probability without<br>DPI | Probability with surgical<br>mask | Probability with FFP2<br>mask |
|----------|--------|----|----------------------------|-----------------------------------|-------------------------------|
| a        | 120    | 9  | 99.9%                      | 98.9%                             | 80.3%                         |
| b        | 120    | 9  | 99.9%                      | 98.9%                             | 80.3%                         |
| c        | 120    | 9  | 99.9%                      | 98.9%                             | 80.3%                         |
| d        | 120    | 9  | 99.8%                      | 98.9%                             | 79.8%                         |
| e        | 120    | 10 | 99.8%                      | 98.5%                             | 77.7%                         |
| f        | 120    | 9  | 99.8%                      | 98.9%                             | 79.8%                         |
| g        | 120    | 9  | 99.8%                      | 98.9%                             | 79.8%                         |
| h        | 120    | 9  | 99.8%                      | 98.9%                             | 79.8%                         |
| i        | 120    | 9  | 99.8%                      | 98.9%                             | 79.8%                         |

**Table S7.** Probability calculation performed for Case 3 at an interval of 30 minutes in the absence of PPE, in the presence of a surgical mask, and in the presence of an FFP2 mask.

| Position | E(ppm) | DR   | Probability without<br>DPI | Probability with surgical<br>mask | Probability with FFP2<br>mask |
|----------|--------|------|----------------------------|-----------------------------------|-------------------------------|
| a        | 950    | 63   | 21.1%                      | 15.3%                             | 5.8%                          |
| b        | 950    | 63   | 21.1%                      | 15.3%                             | 5.8%                          |
| c        | 950    | 63   | 21.1%                      | 15.3%                             | 5.8%                          |
| d        | 850    | 71   | 19.1%                      | 13.8%                             | 5.2%                          |
| e        | 50     | 1200 | 1.2%                       | 0.9%                              | 0.3%                          |
| f        | 300    | 200  | 7.2%                       | 5.1%                              | 1.9%                          |
| g        | 600    | 100  | 13.9%                      | 10.0%                             | 3.7%                          |
| h        | 300    | 200  | 7.2%                       | 5.1%                              | 1.9%                          |
| i        | 300    | 200  | 7.2%                       | 5.1%                              | 1.9%                          |

**Table S8.** Probability calculation performed for Case 3 at an interval of 1 hour in the absence of PPE, in the presence of a surgical mask, and in the presence of an FFP2 mask.

| Position | E(ppm) | DR  | Probability without<br>DPI | Probability with surgical<br>mask | Probability with FFP2<br>mask |
|----------|--------|-----|----------------------------|-----------------------------------|-------------------------------|
| a        | 950    | 63  | 37.8%                      | 28.3%                             | 11.2%                         |
| b        | 950    | 63  | 37.8%                      | 28.3%                             | 11.2%                         |
| c        | 950    | 63  | 37.8%                      | 28.3%                             | 11.2%                         |
| d        | 150    | 400 | 7.2%                       | 5.1%                              | 1.9%                          |

|   |     |      |       |       |      |
|---|-----|------|-------|-------|------|
| e | 50  | 1200 | 2.5%  | 1.7%  | 0.6% |
| f | 600 | 100  | 25.9% | 18.9% | 7.2% |
| g | 600 | 100  | 25.9% | 18.9% | 7.2% |
| h | 150 | 400  | 7.2%  | 5.1%  | 1.9% |
| i | 300 | 200  | 13.9% | 10.0% | 3.7% |

**Table S9.** Probability calculation performed for Case 3 at an interval of 2 hours in the absence of PPE, in the presence of a surgical mask, and in the presence of an FFP2 mask.

| Position | E(ppm) | DR   | Probability without DPI | Probability with surgical mask | Probability with FFP2 mask |
|----------|--------|------|-------------------------|--------------------------------|----------------------------|
| a        | 950    | 63   | 61.3%                   | 48.6%                          | 21.1%                      |
| b        | 950    | 63   | 61.3%                   | 48.6%                          | 21.1%                      |
| c        | 950    | 63   | 61.3%                   | 48.6%                          | 21.1%                      |
| d        | 150    | 400  | 13.9%                   | 10.0%                          | 3.7%                       |
| e        | 50     | 1200 | 4.9%                    | 3.4%                           | 1.2%                       |
| f        | 700    | 86   | 50.3%                   | 38.7%                          | 16.1%                      |
| g        | 700    | 86   | 50.3%                   | 38.7%                          | 16.1%                      |
| h        | 150    | 400  | 13.9%                   | 10.0%                          | 3.7%                       |
| i        | 300    | 200  | 25.9%                   | 18.9%                          | 7.2%                       |

**Table S10.** Probability calculation performed for Case 4 at an interval of 30 minutes in the absence of PPE, in the presence of a surgical mask, and in the presence of an FFP2 mask.

| Position | E(ppm) | DR   | Probability without DPI | Probability with surgical mask | Probability with FFP2 mask |
|----------|--------|------|-------------------------|--------------------------------|----------------------------|
| a        | 950    | 63   | 21.1%                   | 15.3%                          | 5.8%                       |
| b        | 950    | 63   | 21.1%                   | 15.3%                          | 5.8%                       |
| c        | 950    | 63   | 21.1%                   | 15.3%                          | 5.8%                       |
| d        | 150    | 400  | 3.7%                    | 2.6%                           | 0.9%                       |
| e        | 50     | 1200 | 1.2%                    | 0.9%                           | 0.3%                       |
| f        | 500    | 120  | 11.8%                   | 8.4%                           | 3.1%                       |
| g        | 150    | 400  | 3.7%                    | 2.6%                           | 0.9%                       |
| h        | 50     | 1200 | 1.2%                    | 0.9%                           | 0.3%                       |
| i        | 200    | 300  | 4.9%                    | 3.4%                           | 1.2%                       |

**Table S11.** Probability calculation performed for Case 4 at an interval of 1 hour in the absence of PPE, in the presence of a surgical mask, and in the presence of an FFP2 mask.

| Position | E(ppm) | DR | Probability without DPI | Probability with surgical mask | Probability with FFP2 mask |
|----------|--------|----|-------------------------|--------------------------------|----------------------------|
| a        | 950    | 63 | 37.8%                   | 28.3%                          | 11.2%                      |
| b        | 950    | 63 | 37.8%                   | 28.3%                          | 11.2%                      |

|   |     |      |       |       |       |
|---|-----|------|-------|-------|-------|
| c | 950 | 63   | 37.8% | 28.3% | 11.2% |
| d | 300 | 200  | 13.9% | 10.0% | 3.7%  |
| e | 150 | 400  | 7.2%  | 5.1%  | 1.9%  |
| f | 500 | 120  | 22.1% | 16.1% | 6.1%  |
| g | 150 | 400  | 7.2%  | 5.1%  | 1.9%  |
| h | 50  | 1200 | 2.5%  | 1.7%  | 0.6%  |
| i | 150 | 400  | 7.2%  | 5.1%  | 1.9%  |

**Table S12.** Probability calculation performed for Case 4 at an interval of 2 hours in the absence of PPE, in the presence of a surgical mask, and in the presence of an FFP2 mask.

| Position | E(ppm) | DR   | Probability without DPI | Probability with surgical mask | Probability with FFP2 mask |
|----------|--------|------|-------------------------|--------------------------------|----------------------------|
| a        | 950    | 63   | 61.3%                   | 48.6%                          | 21.1%                      |
| b        | 950    | 63   | 61.3%                   | 48.6%                          | 21.1%                      |
| c        | 950    | 63   | 61.3%                   | 48.6%                          | 21.1%                      |
| d        | 950    | 400  | 61.3%                   | 48.6%                          | 21.1%                      |
| e        | 150    | 1200 | 13.9%                   | 10.0%                          | 3.7%                       |
| f        | 700    | 86   | 50.3%                   | 38.7%                          | 16.1%                      |
| g        | 200    | 86   | 18.1%                   | 13.1%                          | 4.9%                       |
| h        | 50     | 400  | 4.9%                    | 3.4%                           | 1.2%                       |
| i        | 300    | 200  | 25.9%                   | 18.9%                          | 7.2%                       |

**Table S13.** Probability calculation performed for Case 5 at an interval of 30 minutes in the absence of PPE, in the presence of a surgical mask, and in the presence of an FFP2 mask.

| Position | E(ppm) | DR   | Probability without DPI | Probability with surgical mask | Probability with FFP2 mask |
|----------|--------|------|-------------------------|--------------------------------|----------------------------|
| a        | 950    | 63   | 21.1%                   | 15.3%                          | 5.8%                       |
| b        | 950    | 63   | 21.1%                   | 15.3%                          | 5.8%                       |
| c        | 950    | 63   | 21.1%                   | 15.3%                          | 5.8%                       |
| d        | 300    | 200  | 7.2%                    | 5.1%                           | 1.9%                       |
| e        | 50     | 1200 | 1.2%                    | 0.9%                           | 0.3%                       |
| f        | 150    | 400  | 3.7%                    | 2.6%                           | 0.9%                       |
| g        | 50     | 1200 | 1.2%                    | 0.9%                           | 0.3%                       |
| h        | 50     | 1200 | 1.2%                    | 0.9%                           | 0.3%                       |
| i        | 50     | 1200 | 1.2%                    | 0.9%                           | 0.3%                       |

**Table S14.** Probability calculation performed for Case 5 at an interval of 1 hour in the absence of PPE, in the presence of a surgical mask, and in the presence of an FFP2 mask.

| Position | E(ppm) | DR | Probability without DPI | Probability with surgical mask | Probability with FFP2 mask |
|----------|--------|----|-------------------------|--------------------------------|----------------------------|
|----------|--------|----|-------------------------|--------------------------------|----------------------------|

|   |     |      |       |       |       |
|---|-----|------|-------|-------|-------|
| a | 950 | 63   | 37.8% | 28.3% | 11.2% |
| b | 950 | 63   | 37.8% | 28.3% | 11.2% |
| c | 500 | 120  | 22.1% | 16.1% | 7.1%  |
| d | 950 | 63   | 37.8% | 28.3% | 11.2% |
| e | 50  | 1200 | 2.5%  | 1.7%  | 0.6%  |
| f | 150 | 400  | 7.2%  | 5.1%  | 1.9%  |
| g | 50  | 1200 | 2.5%  | 1.7%  | 0.6%  |
| h | 50  | 1200 | 2.5%  | 1.7%  | 0.6%  |
| i | 50  | 1200 | 2.5%  | 1.7%  | 0.6%  |

**Table S15.** Probability calculation performed for Case 5 at an interval of 2 hours in the absence of PPE, in the presence of a surgical mask, and in the presence of an FFP2 mask.

| Position | E(ppm) | DR   | Probability without<br>DPI | Probability with surgical<br>mask | Probability with FFP2<br>mask |
|----------|--------|------|----------------------------|-----------------------------------|-------------------------------|
| a        | 950    | 63   | 61.3%                      | 48.6%                             | 21.1%                         |
| b        | 950    | 63   | 61.3%                      | 48.6%                             | 21.1%                         |
| c        | 300    | 63   | 25.9%                      | 18.9%                             | 7.2%                          |
| d        | 800    | 400  | 55.1%                      | 42.9%                             | 18.1%                         |
| e        | 50     | 1200 | 4.9%                       | 3.4%                              | 1.2%                          |
| f        | 150    | 86   | 13.9%                      | 10.0%                             | 3.7%                          |
| g        | 50     | 86   | 4.9%                       | 3.4%                              | 1.2%                          |
| h        | 50     | 400  | 4.9%                       | 3.4%                              | 1.2%                          |
| i        | 100    | 200  | 9.5%                       | 6.8%                              | 2.5%                          |
